# Supplementary material for: Surface-active site modulation of the S-scheme heterojunction toward exceptional photocatalytic performance
Source: Royal Society of Chemistry journal article supplement (doi:10.1039/d2nr05341a), 2022-01-01
Supplement: d2nr05341a1.pdf [file d2nr05341a1.pdf]

**Supporting information**

***Surface Active Site Modulation of the S-scheme Heterojunction toward Exceptional  
Photocatalytic Performance***

*Jing Wang,<sup>‡a</sup> Zhongliao Wang,<sup>‡a</sup> Jinfeng Zhang,<sup>‡a</sup> Siang-Piao Chai,<sup>c</sup> Kai Dai,<sup>\*a</sup> and  
Jingxiang Low<sup>\*b,c</sup>*

*<sup>a</sup>Key Laboratory of Green and Precise Synthetic Chemistry and Applications, Ministry of Education, Huaibei Normal University, Huaibei, 235000, P. R. China. Email: daikai940@chnu.edu.cn*

*<sup>b</sup>Hefei National Laboratory for Physical Sciences at the Microscale, University of Science and Technology of China, Hefei, Anhui 230026, P. R. China. Email: jxlow@ustc.edu.cn*

*<sup>c</sup>Multidisciplinary Platform of Advanced Engineering, Chemical Engineering Discipline, School of Engineering, Monash University, Bandar Sunway 47500, Selangor, Malaysia*

*<sup>‡</sup>These authors contributed equally to this work.*

## 1. Materials

Sodium trithiocyanurate ( $C_3N_3Na_3S_3$ ), cadmium nitrate hydrate ( $Cd(NO_3)_2 \cdot 5H_2O$ ), nickel nitrate hydrate ( $Ni(NO_3)_2 \cdot 6H_2O$ ), thiourea ( $CH_4N_2S$ ), absolute ethanol ( $C_2H_6O$ ), sodium sulfide ( $Na_2S$ ), sodium sulfite ( $NaSO_3$ ), chloroplatinic acid ( $H_2PtCl_6$ ), thiourea ( $CH_4N_2S$ ). Deionized water (18.25 M $\Omega$ ) was used throughout the experiment.

## 2. Experimental details

**2.1 Fabrication of CdCNS.** 2.313 g  $Cd(NO_3)_2 \cdot 5H_2O$  and 1.216 g  $C_3N_3Na_3S_3$  were separately dissolved in 100 mL DI water and stirred violently until the color of the mixture turned transparent. Then,  $C_3N_3Na_3S_3$  solution was added dropwise to the  $Cd(NO_3)_2 \cdot 5H_2O$  solution. Subsequently, the mixture was aged with stirring at room temperature for 24 h. Finally, the CdCNS can be obtained by washing, and drying.

**2.2 Synthesis of CdCNS/CdS porous composites.** The CdCNS/CdS composite was prepared via calcination. Specifically, 0.5 g CdCNS was added to the crucible and calcined in a muffle furnace at varying temperatures of 300 °C, 400 °C, and 500 °C, and the obtained products were denoted as CdCNS/CdS300, CdCNS/CdS400, and CdCNS/CdS500, respectively.

**2.4 Synthesis of X%NiS-CdCNS/CdS porous composites.** The NiS was loaded on the CdCNS/CdS via light irradiation in the presence of  $Ni(NO_3)_2 \cdot 6H_2O$  as Ni source. For instance, 60 mg obtained CdCNS/CdS400 was mixed with 10 mL  $Ni(NO_3)_2 \cdot 6H_2O$  (0.0002 g/mL), 2.5 mL  $CH_4N_2S$  (0.0002 g/mL), 12 mL absolute ethanol and 12 mL DI mixture mixed. The mixture was then added in a three-necked flask and bubbled with  $N_2$  for 30 min to remove air. Subsequently, the mixture was irradiated under 300 W Xe

lamp for 15 min. After irradiation, the sample was washed via centrifugation for 6 times with DI water. Finally, the NiS-CdCNS/CdS can be obtained by freeze-drying. By dropping numbers Ni(NO<sub>3</sub>)<sub>2</sub>·6H<sub>2</sub>O solution by 6, 10 and 14, the NiS-CdCNS/CdS with NiS mass ratios of 0.6% (0.6% NiS-CdCNS/CdS400), 1% (1% NiS-CdCNS/CdS400) and 1.4% (1.4% NiS-CdCNS/CdS400) can be respectively prepared. 1% Pt-CdCNS/CdS400 was also prepared by substituting Ni(NO<sub>3</sub>)<sub>2</sub>·6H<sub>2</sub>O and CH<sub>4</sub>N<sub>2</sub>S with H<sub>2</sub>PtCl<sub>6</sub>.

### **3. Characterization**

The crystal phase structures of prepared samples were examined via X-ray diffraction diffractometer (XRD RIGAKU) with Cu K $\alpha$  radiation. The surface morphology and the composition of prepared samples were studied by field emission scanning electron microscope (FESEM, Hitachi S5500) with energy-dispersive X-ray spectroscopy (EDS) and transmission electron microscopy (TEM JEOL JEM-2010). The surface structures of the prepared samples were analyzed using Fourier transform infrared spectroscopy (FT-IR Nicolet 6700) and X-ray photoelectron spectroscopy (XPS Thermo ESCALAB 250). The specific surface area of the prepared samples was determined by Brunauer-Emmett-Teller (BET) method, using a surface analytical instrument (ASAP 2010) by N<sub>2</sub> gas adsorption. The diffuse reflectance absorption spectra (DRS) and photoluminescence (PL) of the prepared samples were measured by a UV-vis spectrophotometer (PerkinElmer Lambda 950) with BaSO<sub>4</sub> reference and a FLS920 fluorescence spectrometer at room temperature, respectively. The electrochemical measurements were recorded by a Shanghai Chenhua CHI-660D

workstation in a 3-electrode cell. A Pt electrode and a calomel electrode were used as the counter and reference electrode, respectively.

#### 4. Photocatalytic activity evaluation

The photocatalytic H<sub>2</sub> experiments were performed in a 250 mL Pyrex flask. Typically, 20 mg photocatalyst was dispersed in 50 mL aqueous solution of 0.35 M Na<sub>2</sub>S·9H<sub>2</sub>O and 0.25 M Na<sub>2</sub>SO<sub>3</sub>. The photoreactor was irradiated by a 300 W Xenon lamp (CEL-HXF300, Ceaulight, China) equipped with a 420 nm cut-off filter. The irradiation distance between the flask and the lamp was set to 20 cm. The generated H<sub>2</sub> was determined with gas chromatography (Ceaulight GC-7900, TCD). In addition, the apparent quantum efficiency (QE) for H<sub>2</sub> evolution was measured under the same photocatalytic reaction condition. The intensity and number of photons of the light source at 420 nm were measured by a light intensity meter. The QE was finally calculated according to Eq. (S1):

$$\text{QE}(\%) = \frac{\text{number of evolved hydrogen atoms } (N_H)}{\text{number of incident photons } (N_P)} \times 100\% \quad (\text{S1})$$

$$N_P = \frac{A \cdot I}{E} \cdot t = \frac{A \cdot I}{(hc/\lambda)} \cdot t$$

$$N_P = 2 \times n_{H_2} \times L$$

where  $n_{H_2}$  is the moles of evolved hydrogen;  $L$  is the Avogadro constant,  $6.02 \times 10^{23} \text{ mol}^{-1}$ ;  $I$  is the light intensity at 420 nm;  $A$  is the illumination area;  $E$  is the photon energy;  $h$  is the Plank Constant,  $6.63 \times 10^{-34} \text{ J}\cdot\text{s}$ ;  $c$  is the speed of light,  $3 \times 10^8 \text{ m/s}$ .

#### 5. Computational detail

The materials calculations were performed using optimized interface contact structures

of CdCNS/CdS and NiS/CdCNS shown in Fig. 10a and b, respectively. The charge distributions of the CdCNS/CdS and NiS/CdCNS heterostructures were analyzed by differential charge density. The calculation of the differential charge density difference was based on Density function theory (DFT) calculations through the CP2K-9.1 package. Perdew-Burke-Ernzerh (PBE) of functional was applied to describe the system. Unrestricted Kohn-Sham DFT was used as the electronic structure method in the Gaussian and Plane Waves (GPW) approach. The Goedecker-Teter-Hutter (GTH) pseudopotentials and Double- $\zeta$  molecularly optimized basis sets (DZVP-MOLOPT-GTH) were used for all elements. A plane-wave energy cutoff of 400 Ry has been employed. The geometries were optimized using the Broyden-Fletcher-Goldfarb-Shanno (BFGS) algorithm and the convergence criterion for the forces was set to  $4.5 \times 10^{-4}$  bohr/hartree. A vacuum layer of 15 Å was constructed to eliminate interactions between periodic structures of surface models. The van der Waals (vdW) interaction was complemented by Grimme's DFT-D3 method.

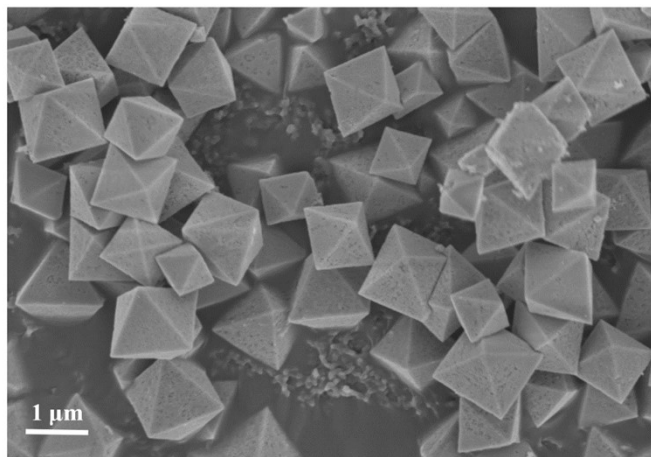

**Fig. S1.** SEM image of CdCNS/CdS400.

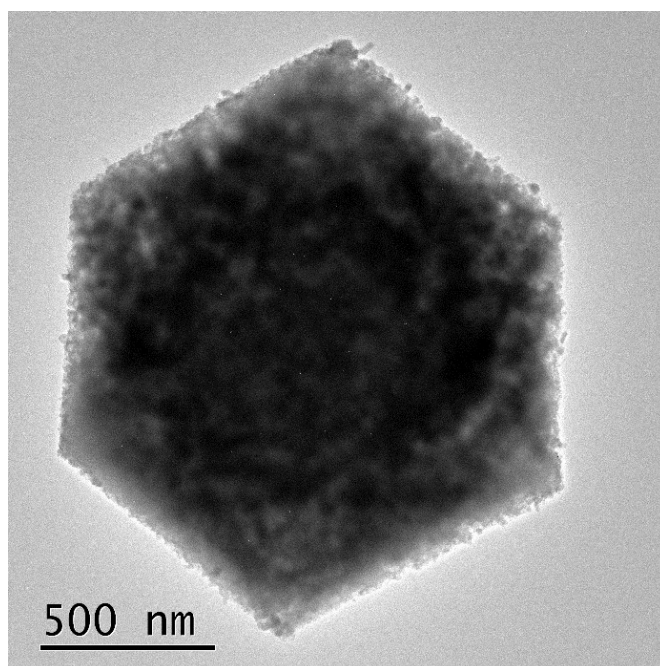

**Fig. S2.** TEM image of CdCNS/CdS400.

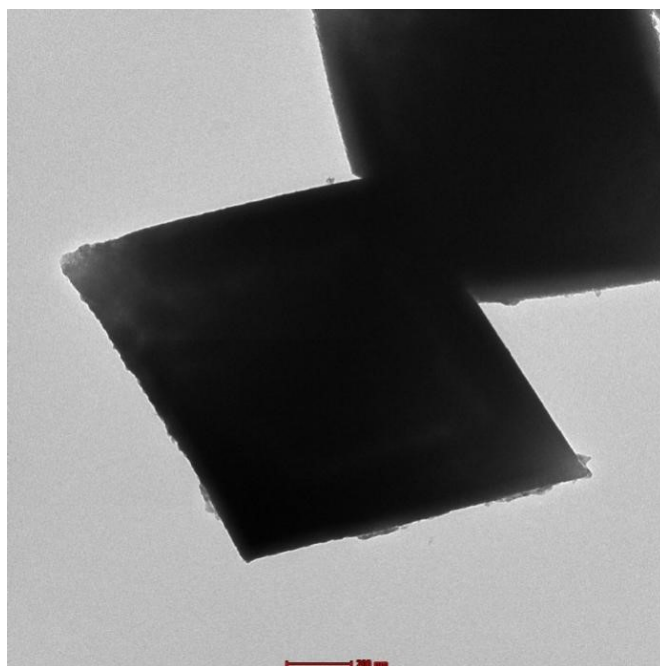

**Fig. S3.** TEM image of CdCNS.



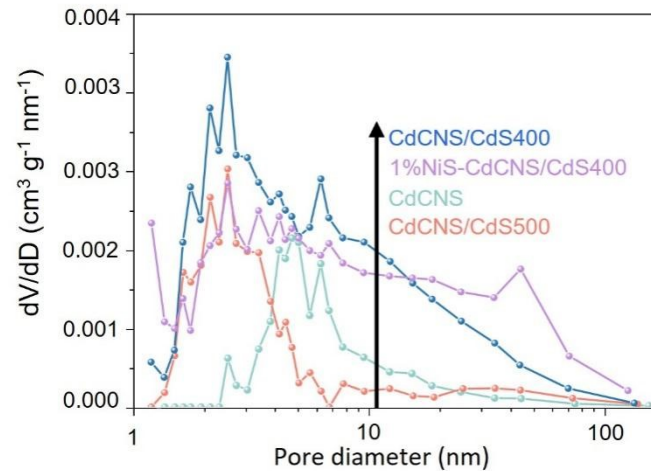

**Fig. S4.** Pore size distribution curves of as-prepared photocatalysts.

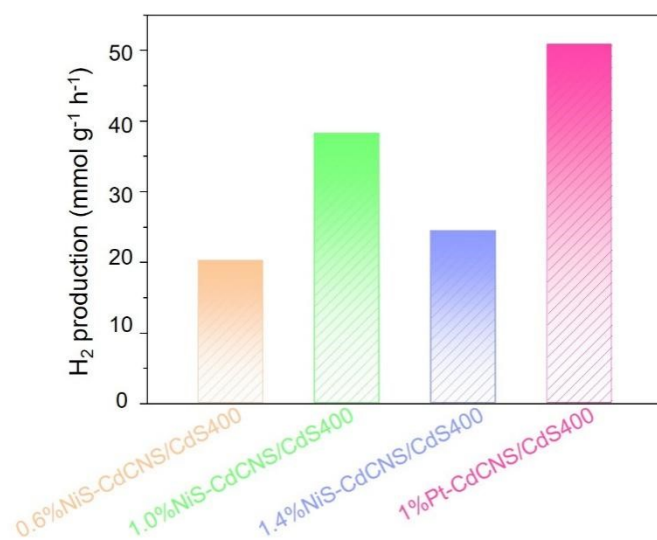

**Fig. S5.** Comparison of photocatalytic H<sub>2</sub> generation performance of a series of photocatalysts.
